# Supplementary material
Source: PubMed Central journal article supplement (PMC2860371)
Supplement: cb900295g_si_001.pdf [file cb900295g_si_001.pdf]

# STRUCTURAL ELUCIDATION OF CISOID AND TRANSOID CYCLIZATION PATHWAYS OF A SESQUITERPENE SYNTHASE USING 2-FLUOROFARNESYL DIPHOSPHATES

By Joseph P. Noel, Nikki Dellas, Juan A. Faraldos, Yuxin Zhao, B. Andes Hess, Jr., Lidia Smentek, Robert M. Coates, and Paul E. O'Maille

## SUPPORTING INFORMATION

### Table of Contents

|                                                                                                          |     |
|----------------------------------------------------------------------------------------------------------|-----|
| Preparation and characterization of (2- <i>cis</i> , 6- <i>trans</i> )-2-fluorofarnesyl diphosphate..... | S2  |
| Global comparison of TEAS wt and M4 crystal structures (Table S1).....                                   | S5  |
| Annotation of structures by B-factor (Figure S1).....                                                    | S6  |
| J-K loop comparison between current and previous TEAS structures (Figure S2).....                        | S7  |
| Spatial distribution of M4 mutations (Figure S3).....                                                    | S8  |
| Farnesyl chain topology of wild-type TEAS from fluorofarnesyl analogues(Figure S4).....                  | S9  |
| Mutational effects in M4 TEAS on the active site contour and substrate-binding (Figure S5)..             | S10 |
| Computational Details.....                                                                               | S11 |
| Supplemental methods (protein expression, purification and kinetic measurement).....                     | S31 |

## Preparation and Characterization of (2-*cis*, 6-*trans*)-2-Fluorofarnesyl Diphosphate

### General Aspects:

$^1\text{H}$  and  $^{13}\text{C}$  NMR spectra were recorded in  $\text{CDCl}_3$  ( $^1\text{H}$ , 7.26;  $^{13}\text{C}$ , 77.0) or  $\text{CD}_3\text{OD}$  [ $^1\text{H}$ , 3.31 (quintet);  $^{13}\text{C}$ , 49.2 (septet)] with U400 and U500 spectrometers in SCS NMR Spectroscopy Facility at the University of Illinois. Chemical shifts are in ppm and coupling constants are in Hertz. The abbreviation 'app' is used to describe the apparent multiplicity of the peak and may or may not be a valid first-order analysis.

All chemical reactions were performed in flame-dried glassware under nitrogen. THF and  $\text{Et}_2\text{O}$  were dried and distilled from Na/benzophenone; benzene and  $\text{CH}_2\text{Cl}_2$  were dried and distilled from  $\text{CaH}_2$ . Hexane and ethyl acetate were freshly distilled from  $\text{CaH}_2$ . DMF, acetonitrile, and  $\text{CDCl}_3$  were dried over molecular sieves (4 Å) prior use. TLC analyses were performed on silica gel 60 F254 precoated-plates 250  $\mu\text{m}$ . All retention factors ( $R_f$ ) are on silica gel TLC plates until otherwise noted. TLC visualizations were performed with 5% phosphomolybdic acid (0.2 M in 2.5% concd.  $\text{H}_2\text{SO}_4/\text{EtOH}$  (v/v)),  $\text{I}_2$  vapor, or UV light. Commercial reagents were used without further purification unless specifically noted. Column chromatography was performed according to Still's procedure<sup>1</sup> using 100-700 times excess 32-64  $\mu\text{m}$  grade silica gel. Products separated by chromatography are specified in elution order.

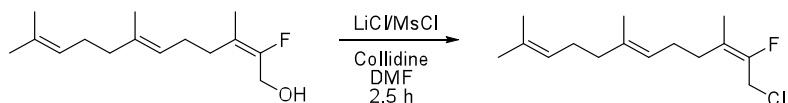

**(2Z, 6E)- 1-Chloro-3,7,11-trimethylundeca-2,6,10-triene ((2-*cis*, 6-*trans*)-2-Fluorofarnesyl Chloride)** (2-*cis*, 6-*trans*)-2-Fluorofarnesol<sup>2</sup> was converted to the allylic chloride under Meyers' conditions<sup>3</sup> as previously described for (2-*trans*, 6-*trans*)-2-fluorofarnesol.<sup>4</sup> Reaction of the

alcohol (44 mg, 0.18 mmol) with LiCl (77 mg, 1.8 mmol), *s*-collidine (222 mg, 1.8 mmol), and MsCl (67 mg, 0.54 mmol) in dry DMF provided the chloride as a yellow oil (47 mg, 99%). The chloride was converted to the diphosphate directly without purification. Product characterization data: TLC  $R_f$  0.83 (15% EtOAc in hexane);  $^1\text{H}$  NMR ( $\text{CDCl}_3$ , 400 MHz)  $\delta$  5.09 (m, 2H, vinyl *H*), 4.18 (dd, 2H,  $J = 22.5, 0.5$  Hz,  $\text{CH}_2\text{Cl}$ ), 1.95-2.18 (m, 8H, 4 $\text{CH}_2$ ), 1.72 (app d, 3H,  $J_{\text{app}} = 3.5$  Hz,  $\text{CH}_3$ ), 1.68 (d, 3H,  $J = 1.0$  Hz,  $\text{CH}_3$ ), 1.60 (s, 6H, 2 $\text{CH}_3$ );  $^{19}\text{F}$  NMR ( $\text{CDCl}_3$ , 376 MHz)  $\delta$  -116.7 (td,  $J = 23.2, 2.8$  Hz).

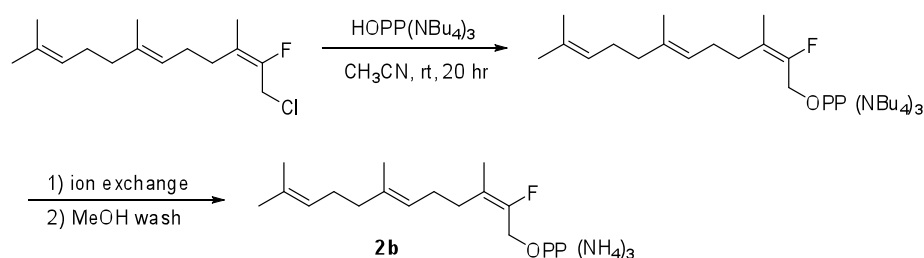

**(2E, 6E)-2-Fluoro-3,7,11-trimethyl undeca-2,6,10-trien-1-yl Diphosphate, Trisammonium Salt (2b, (2-*cis*, 6-*trans*)-2-Fluorofarnesyl Diphosphate).**

The diphosphorylation was carried out as previously described for the *trans,trans* isomer<sup>4</sup> using Poulter's methodology.<sup>5</sup> The reaction of the chloride (47 mg, 0.18 mmol), HOPP(NBu<sub>4</sub>)<sub>3</sub> (320 mg, 0.36 mmol) and 3 Å molecular sieves (400 mg) in CH<sub>3</sub>CN (2.0 mL) provided the crude tetrabutylammonium diphosphate as a yellow oil (366 mg). Based on the  $^{31}\text{P}$  NMR spectrum, it was a 1: 0.81 mixture of inorganic pyrophosphate and organic diphosphate (corrected yield 91%). Ion exchange chromatography on BioRad (NH<sub>4</sub>)<sup>+</sup> cation exchange resin (40 mL of 25 mM NH<sub>4</sub>HCO<sub>3</sub> in 2% v/v 1-propanol/D.I. water) and lyophilization followed by washing with MeOH (3 x 5 mL) to remove the inorganic pyrophosphate afforded the (NH<sub>4</sub>)<sup>+</sup> salt of diphosphate **2b** as a white solid (51 mg, 68 %):  $^1\text{H}$  NMR ( $\text{CD}_3\text{OD}$ , 400 MHz)  $\delta$  5.17-5.11 (m, 1H, vinyl *H*), 5.11-5.05 (m, 1H, vinyl *H*), 4.59 (dd, 2H,  $J = 23.3, 5.4$  Hz,  $\text{CH}_2\text{OPP}$ ), 2.16-2.11 (m, 4H,  $\text{CH}_2$ ), 2.09-2.04 (m, 2H,  $\text{CH}_2$ ), 2.00-1.95 (m, 2H,  $\text{CH}_2$ ), 1.68 (d, 3H,  $J = 3.5$  Hz,  $\text{CH}_3$ ), 1.66 (q, 3H,  $J = 1.2$  Hz,

$CH_3$ ), 1.61 (d, 3H,  $J = 1.2$  Hz,  $CH_3$ ), 1.60 (br d, 3H,  $J = 0.6$  Hz,  $CH_3$ );  $^{31}P$  NMR ( $CD_3OD$ , 162 MHz)  $\delta$  -7.99 (br d,  $J = 14.9$  Hz), -9.30 (br d,  $J = 14.1$  Hz);  $^{19}F$  NMR ( $CD_3OD$ , 376 MHz)  $\delta$  -118.9 (td,  $J = 23.2, 3.5$  Hz).

## References

- (1) Still, W. C.; Kahn, M.; Mitra, A. *J. Org. Chem.* **1978**, *43*, 2923-2925.
- (2) Jin, Y.; Williams, D. C.; Croteau, R.; Coates, R. M. *J. Am. Chem. Soc.*, **2005**, *127*, 7834-7842.
- (3) Collington, E.W.; Meyers, A. I. *J. Org. Chem.* **1971**, *36*, 3044-3045.
- (4) Shishova, E. Y.; Yu, F.; Miller, D. J.; Faraldos, J. A.; Zhao, Y.; Coates, R. M.; Allemann, R. K.; Cane, D. E.; Christianson, D. W. *J. Biol. Chem.* **2008**, *283*, 15431-15439. (ms ref 17).
- (5). Woodside, A. B.; Huang, Z.; Poulter, C. D. *Org. Synth.* **1993**, *Coll. Vol. 8*, 616-620.

**Table S1.** Global comparison of TEAS wt and M4 crystal structures.

|                                    | <b>M4 TEAS·<i>cis</i>-2F-FPP</b> | <b>M4 TEAS·<i>trans</i>-2F-FPP</b> | <b>wt TEAS·<i>cis</i>-2F-FPP</b> | <b>wt TEAS·<i>trans</i>-2F-FPP</b> |
|------------------------------------|----------------------------------|------------------------------------|----------------------------------|------------------------------------|
| <b>M4 TEAS·<i>cis</i>-2F-FPP</b>   | -                                | -                                  | -                                | -                                  |
| <b>M4 TEAS·<i>trans</i>-2F-FPP</b> | 0.242                            | -                                  | -                                | -                                  |
| <b>wt TEAS·<i>cis</i>-2F-FPP</b>   | 0.282                            | 0.321                              | -                                | -                                  |
| <b>TEAS wt·<i>trans</i>-2F-FPP</b> | 0.29                             | 0.328                              | 0.219                            | -                                  |
| <b>5EAT</b>                        | 0.334                            | 0.369                              | 0.294                            | 0.335                              |

Global comparisons were performed by superpositioning all C-alpha carbons to derive root mean square deviation (rmsd) values expressed in the unit angstroms.

TEAS M4 C2F-FPP

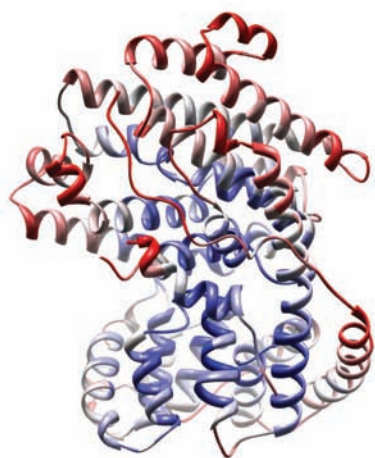

TEAS M4 2F-FPP

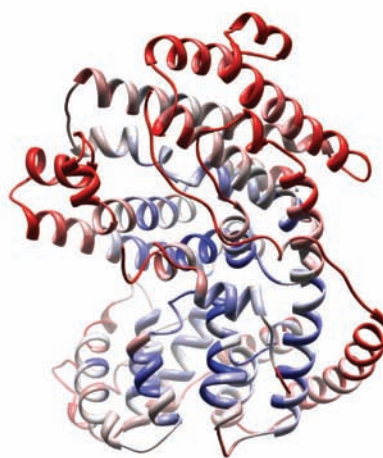

TEAS wt 2F-FPP

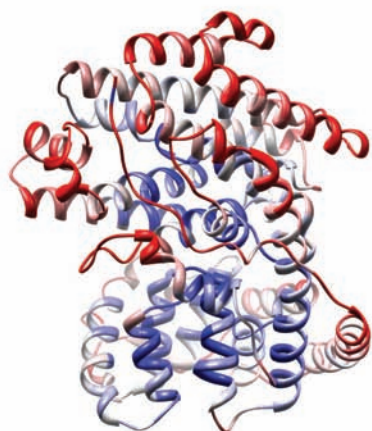

TEAS wt C2F-FPP

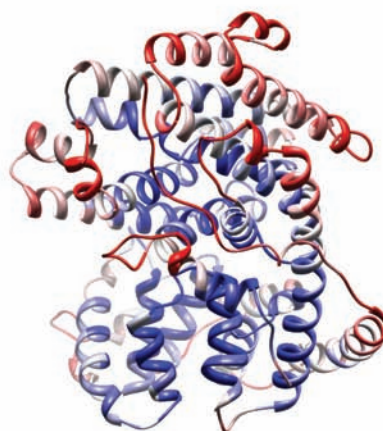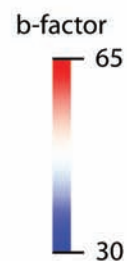

**Figure S1.** Annotation of global structure using B-factors reveals a similar pattern of dynamically accessible polypeptide segments. All structures were colored according to their refined isotropic by B-factors, with the corresponding color values of the blue to red gradient shown in the legend at the bottom right.

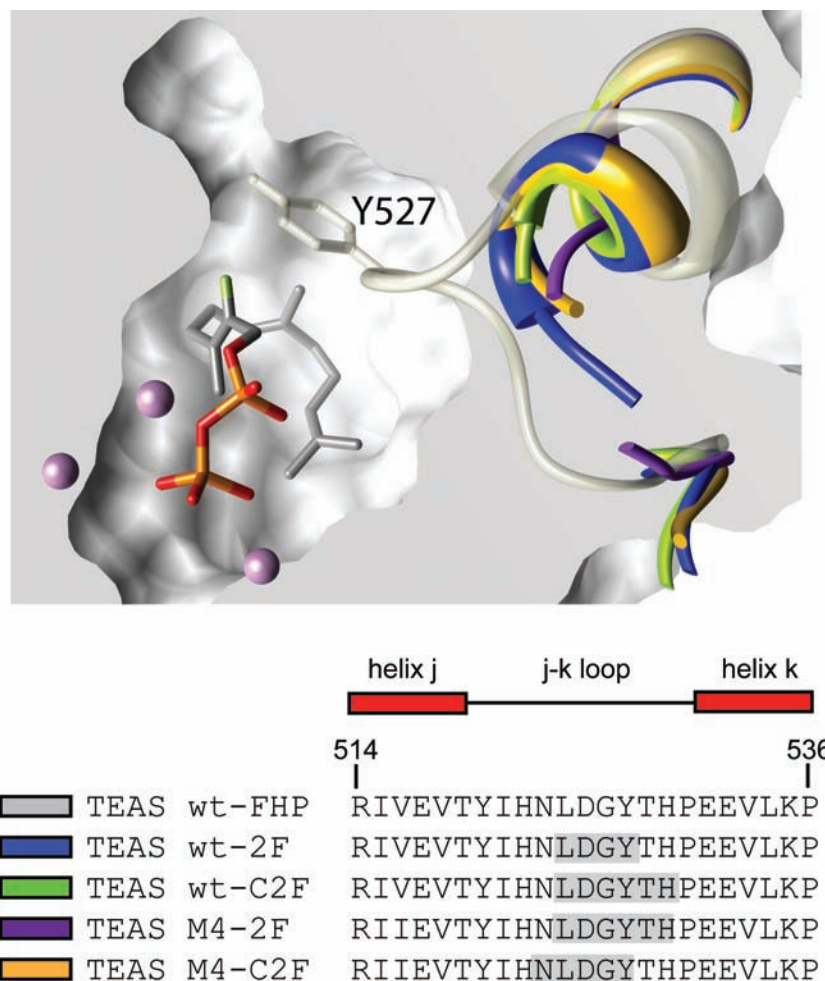

**Figure S2.** Disorder in the J-K loop of experimental crystal structures. An active site model for the wild-type TEAS *trans*-2F-FPP is shown as a van der Waals surface clipped to reveal the bound substrate analogue and helices J and K with the intervening loops. All experimental structures are overlaid on the original TEAS-FHP structure (pdb id 5eat) shown in a grey semitransparent trace. Each structure is colored as indicated in the legend below, with the omitted J-K loop regions highlighted in grey.

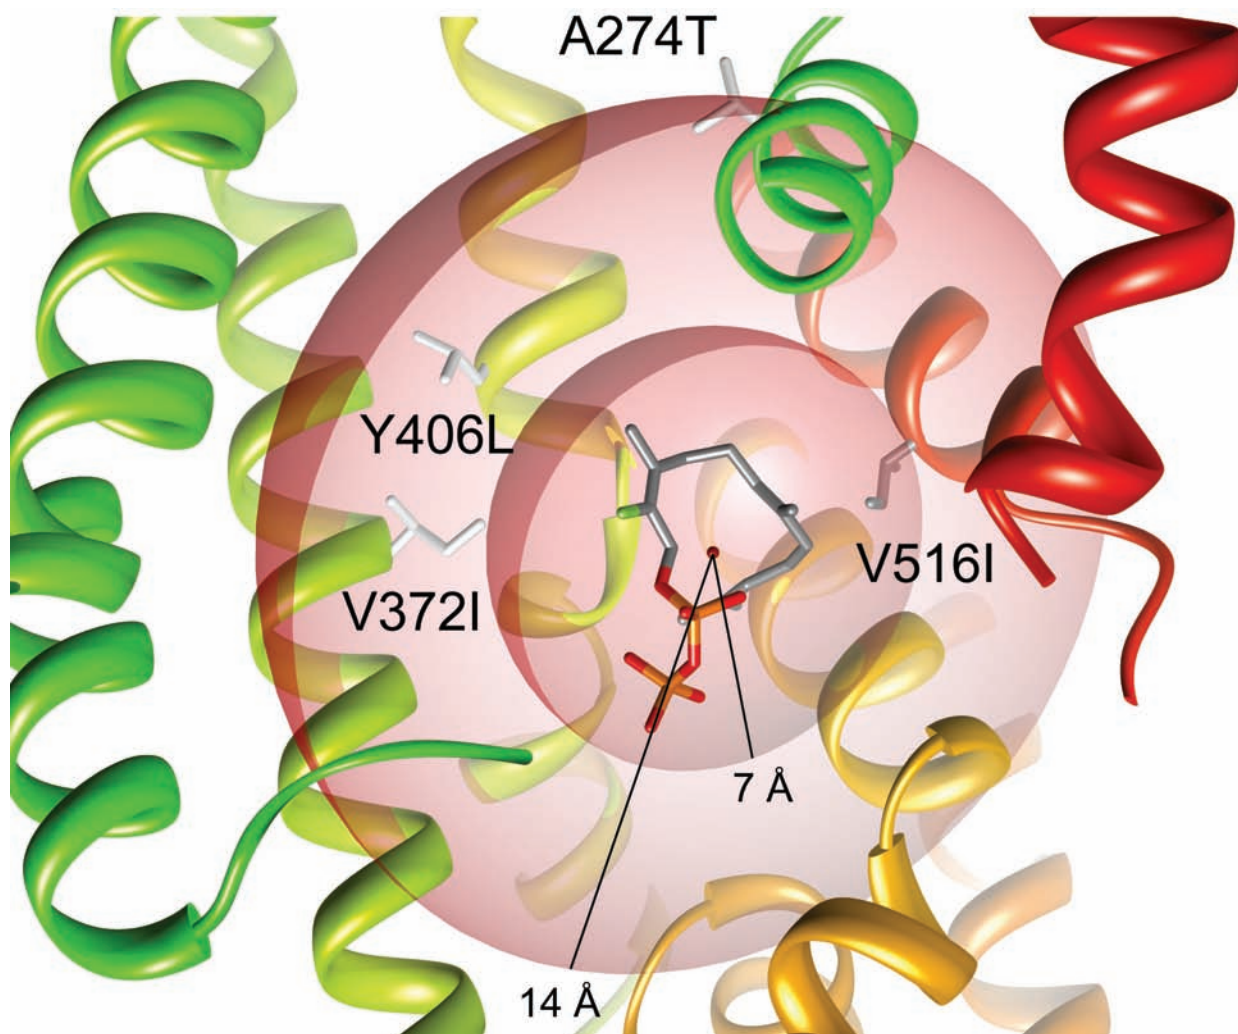

**Figure S3.** Spatial distribution of M4 mutations and closest distances to the farnesyl chain. a. The global structure of M4 TEAS with bound *cis*-2F-FPP ligand modeled into the active site and the protein backbone is depicted as rainbow colored ribbons. Distances from the active site center to the side-chains of the M4 mutations are shown as dashed lines.



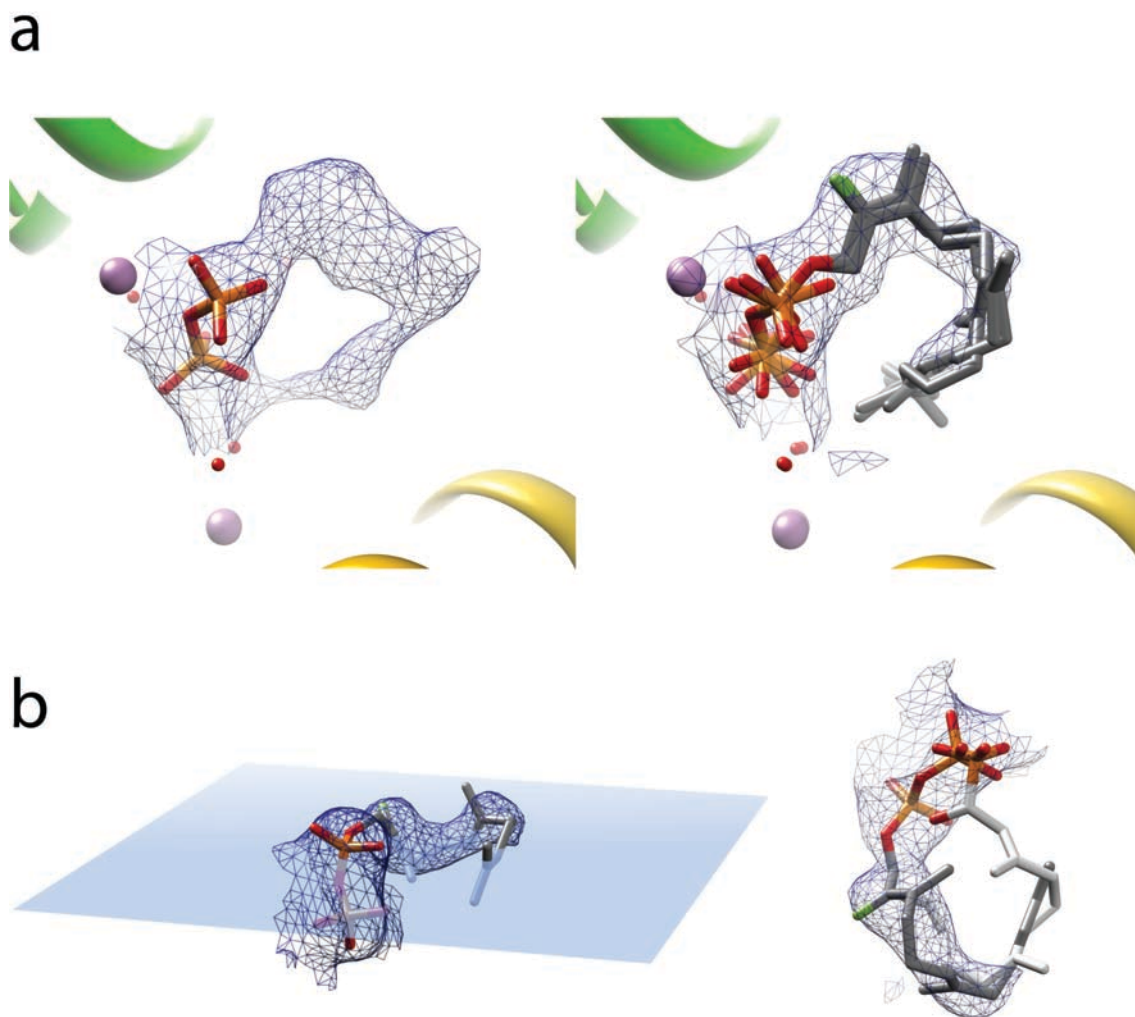

**Figure S4.** Farnesyl chain topology of wild-type TEAS from fluorofarnesyl analogues. a. Observable electron density from the wild-type complex with *cis*-2F-FPP reveals a U-shaped curl (left panel) possibly contributed to by four distinct binding modes of the farnesyl chain (right panel). b. Calculated electron density contoured at  $1\sigma$  in the SIGMAA-weighted 2Fo-Fc map with the modeled *trans*-2F-FPP shown with a plane passing through the U-shape curl of the farnesyl chain (left panel). An overlay of *trans*-2F-FPP (silver chain) with farnesylhydroxy phosphonate (FHP, white chain) in the calculated electron density for the *trans*-2F-FPP ligand from the left panel.

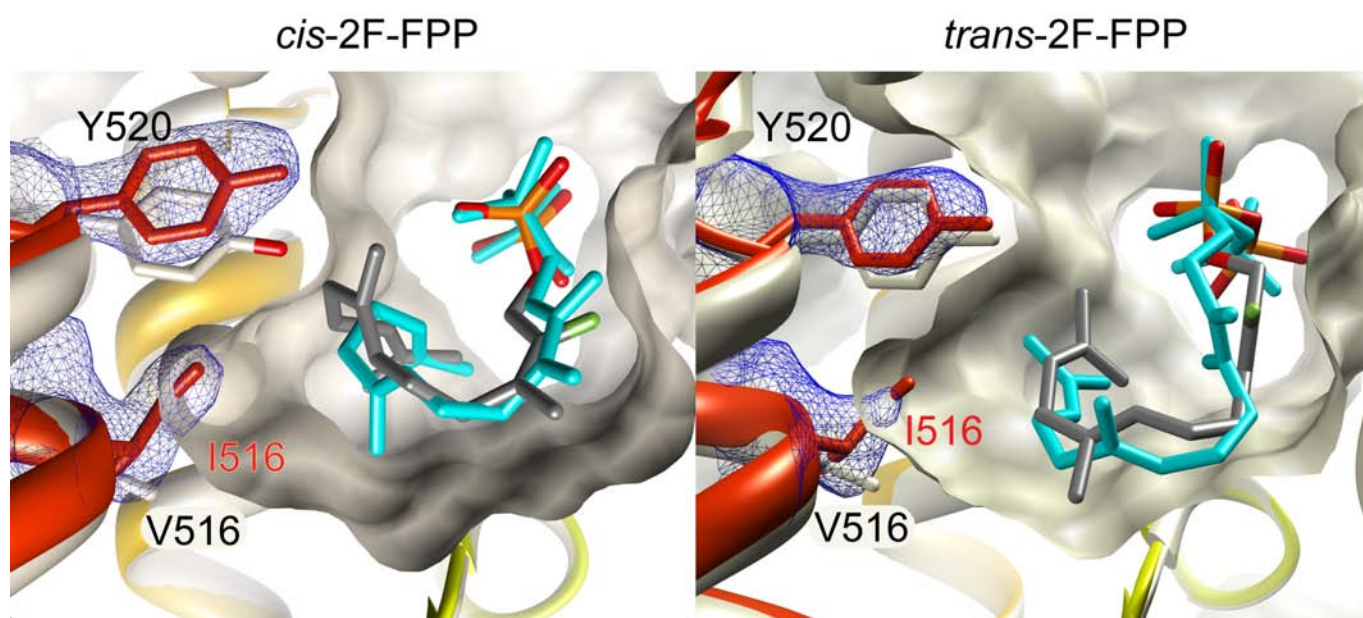

**Figure S5.** Spatial depiction of mutational effects in M4 TEAS on the active site contour and substrate-binding mode in the *trans*-2F-FPP and *cis*-2F-FPP complexes. The ribbon and active site surface (cream) of wild-type TEAS wild is superimposed on the corresponding M4 TEAS 2F-FPP complex, with ribbons and side chains rendered with rainbow coloration (as in Fig. 3a and 4a). The ligand from wild-type TEAS (cyan) and M4 TEAS (gray) is overlaid and electron density from the SIGMAA-weighted  $2F_o - F_c$  electron density maps at  $1\sigma$  is shown for Y520 and I516 for the M4 TEAS structures.

## Computational Details

As noted in the article Hong and Tantillo<sup>1</sup> concurrently carried out computational studies on the conversion of (6*S*)- $\alpha$ -bisabolyl cation to  $\alpha$ -cedrene. In Figure 2a of the current article, the pathway reported by Hong and Tantillo proceeds via the curved blue arrow, avoiding the formation of the  $\alpha$ -acorenyl cation. In contrast to this, we located an alternative pathway (red curved arrow via transition structure **14**) that instead avoids the formation of the (7*R*)- $\beta$ -bisabolyl cation. The question then arises how might two pathways exist that both lead from (6*S*)- $\alpha$ -bisabolyl cation to  $\alpha$ -cedrene (**3**). It was found that these two pathways lead from two different conformers, **a** and **b** of (6*S*)- $\alpha$ -bisabolyl cation (Figure S7):

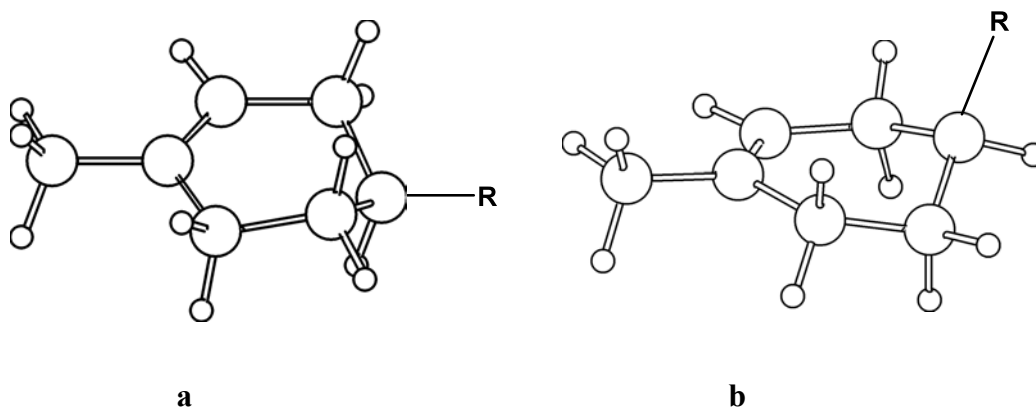

**Figure S6.**

Note that the location of the side-chain (**R**) in these two conformers is quite different and might very well affect the course of any reaction they might undergo. The enzyme could utilize this by it “freezing” one of these conformers, which would direct the course of the ensuing reaction. The red pathway (via transition structure **14**) shown in Figure 2 in the article leads from

<sup>1</sup> Hong, Y. J.; Tantillo, D. J. *J. Am. Chem. Soc.* **2009**, *131*, 7999-8015.

conformer **a**, and the blue pathway from **b**. A transition structure was also located that leads from (1*R*, 4*S*, 5*S*)- $\alpha$ -acorenyl cation to the carbocation precursor to (-)- $\alpha$ -cedrene (**2**).<sup>2</sup>

---

<sup>2</sup> An analogous pathway was also located that leads from (6*R*)- $\alpha$ -bisabolycation to the epimer of the (-)- $\alpha$ -cedrene (**2**) shown in Figure 2a in the article (the methyl group in the five-membered ring is *cis* to the CH<sub>2</sub> group of the adjacent six-membered ring:

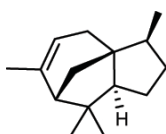

This “epimeric” pathway was essentially indistinguishable from that reported here with the exception of this methyl group placement.

## Geometries and Energies of All Stationary Points

### (6S)- $\alpha$ -bisabolyl cation

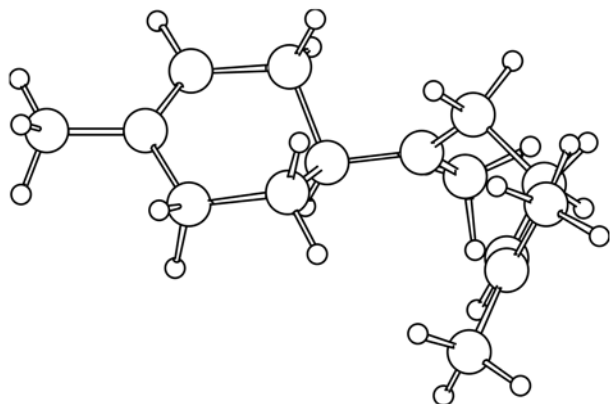

-----  
#6-31g\* b3lyp NOPOP freq(noraman) guess=read geom=check  
-----

Charge = 1 Multiplicity = 1  
-----

|   |   |   |           |           |           |
|---|---|---|-----------|-----------|-----------|
| 1 | 6 | 0 | -2.267409 | -1.296044 | -0.667234 |
| 2 | 6 | 0 | -0.931583 | -0.651595 | -0.274241 |

|    |   |   |           |           |           |
|----|---|---|-----------|-----------|-----------|
| 3  | 6 | 0 | -3.472203 | -0.657890 | -0.011413 |
| 4  | 6 | 0 | -1.070916 | 0.887354  | -0.320722 |
| 5  | 6 | 0 | 0.280379  | 2.960189  | -0.824683 |
| 6  | 6 | 0 | 0.109652  | 1.706628  | -0.054776 |
| 7  | 6 | 0 | 1.106677  | 1.357899  | 0.956191  |
| 8  | 6 | 0 | 2.570046  | 1.102027  | 0.333108  |
| 9  | 6 | 0 | 2.692825  | -0.153128 | -0.466951 |
| 10 | 6 | 0 | -2.110623 | 1.308237  | 0.819681  |
| 11 | 6 | 0 | -3.376071 | 0.506208  | 0.643636  |
| 12 | 6 | 0 | -4.779301 | -1.387881 | -0.162530 |
| 13 | 6 | 0 | 3.305882  | -1.295070 | -0.096742 |
| 14 | 6 | 0 | 3.952077  | -1.536144 | 1.243213  |
| 15 | 6 | 0 | 3.401521  | -2.452853 | -1.058017 |
| 16 | 1 | 0 | -2.397633 | -1.269287 | -1.759619 |
| 17 | 1 | 0 | -2.231792 | -2.362243 | -0.407043 |
| 18 | 1 | 0 | -0.137070 | -0.984027 | -0.948244 |
| 19 | 1 | 0 | -0.651203 | -0.968618 | 0.736385  |
| 20 | 1 | 0 | 0.958984  | 3.678137  | -0.359563 |
| 21 | 1 | 0 | 0.703741  | 2.679048  | -1.805987 |
| 22 | 1 | 0 | -0.684040 | 3.428566  | -1.051122 |
| 23 | 1 | 0 | -1.528362 | 1.196295  | -1.268170 |
| 24 | 1 | 0 | 0.822947  | 0.489097  | 1.550370  |
| 25 | 1 | 0 | 1.239970  | 2.229924  | 1.612201  |
| 26 | 1 | 0 | 2.831023  | 1.981033  | -0.266330 |
| 27 | 1 | 0 | 3.231840  | 1.099656  | 1.200990  |
| 28 | 1 | 0 | 2.265744  | -0.114605 | -1.470631 |
| 29 | 1 | 0 | -1.653515 | 1.133183  | 1.802130  |
| 30 | 1 | 0 | -2.329939 | 2.380017  | 0.752328  |
| 31 | 1 | 0 | -4.263711 | 0.959200  | 1.082507  |
| 32 | 1 | 0 | -5.607047 | -0.841996 | 0.298428  |
| 33 | 1 | 0 | -5.020866 | -1.543664 | -1.222342 |
| 34 | 1 | 0 | -4.726805 | -2.383115 | 0.297402  |
| 35 | 1 | 0 | 5.023817  | -1.735837 | 1.115700  |
| 36 | 1 | 0 | 3.848707  | -0.707346 | 1.947325  |
| 37 | 1 | 0 | 3.526626  | -2.432041 | 1.713078  |
| 38 | 1 | 0 | 4.451567  | -2.707980 | -1.250850 |
| 39 | 1 | 0 | 2.938499  | -3.352814 | -0.632175 |
| 40 | 1 | 0 | 2.922803  | -2.238201 | -2.017890 |

---

SCF Done: E(RB+HF-LYP) = -586.365866023 A.U. after 1 cycles  
Frequencies -- 26.6249 33.7822 50.7079  
Zero-point correction= 0.365327 (Hartree/Particle)  
Thermal correction to Energy= 0.383301  
Thermal correction to Enthalpy= 0.384245  
Thermal correction to Gibbs Free Energy= 0.318499  
Sum of electronic and zero-point Energies= -586.000539  
Sum of electronic and thermal Energies= -585.982565  
Sum of electronic and thermal Enthalpies= -585.981621  
Sum of electronic and thermal Free Energies= -586.047367

mpw1pw91/6-311+G(2d,p)//B3LYP/6-31G\*

DFT = -586.379668

DFT + ZPE = -586.01434

.....  
**14 – transition structure linking (6S)- $\alpha$ -bisabolyl cation with (1R,4S,5S)- $\alpha$ -acorenyl cation**

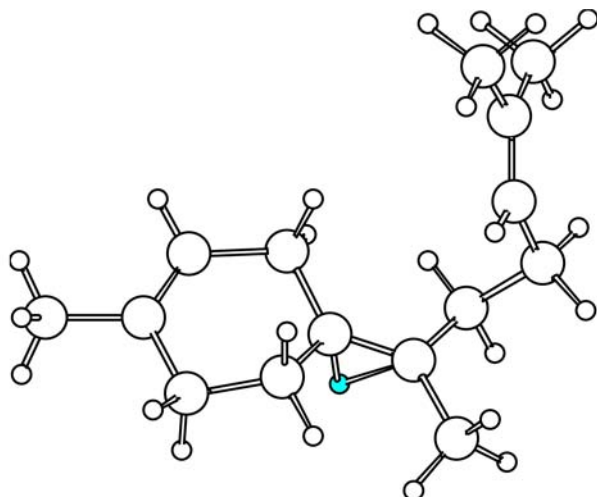

-----  
#freq(noraman) 6-31g\* b3lyp nopop guess=read geom=check  
-----

Charge = 1 Multiplicity = 1

|    |   |   |           |           |           |
|----|---|---|-----------|-----------|-----------|
| 1  | 6 | 0 | -1.561819 | 3.011953  | 0.199064  |
| 2  | 6 | 0 | -0.596343 | 2.165354  | -0.649350 |
| 3  | 6 | 0 | -2.431453 | 2.176256  | 1.111275  |
| 4  | 6 | 0 | 0.091963  | 1.084510  | 0.154049  |
| 5  | 6 | 0 | 2.393059  | 1.672747  | -0.799609 |
| 6  | 6 | 0 | 1.486149  | 0.827695  | 0.068211  |
| 7  | 6 | 0 | 2.138178  | -0.374764 | 0.705617  |
| 8  | 6 | 0 | 2.483062  | -1.448940 | -0.383437 |
| 9  | 6 | 0 | 1.298949  | -1.940581 | -1.174043 |
| 10 | 6 | 0 | -0.869282 | 0.190987  | 0.917631  |
| 11 | 6 | 0 | -2.109742 | 0.909054  | 1.396193  |
| 12 | 6 | 0 | -3.655058 | 2.849425  | 1.671574  |
| 13 | 6 | 0 | 0.656720  | -3.115696 | -1.044314 |
| 14 | 6 | 0 | 0.998249  | -4.177927 | -0.029528 |
| 15 | 6 | 0 | -0.485330 | -3.471675 | -1.964993 |
| 16 | 1 | 0 | -0.999005 | 3.752783  | 0.787173  |
| 17 | 1 | 0 | -2.189736 | 3.598399  | -0.482284 |
| 18 | 1 | 0 | 0.100635  | 2.796731  | -1.201382 |
| 19 | 1 | 0 | -1.178502 | 1.608784  | -1.399054 |
| 20 | 1 | 0 | 3.430557  | 1.582026  | -0.471868 |

|    |   |   |           |           |           |
|----|---|---|-----------|-----------|-----------|
| 21 | 1 | 0 | 2.330674  | 1.299891  | -1.829799 |
| 22 | 1 | 0 | 2.124383  | 2.729935  | -0.816763 |
| 23 | 1 | 0 | 0.928205  | 1.617355  | 1.007487  |
| 24 | 1 | 0 | 1.502022  | -0.837615 | 1.460181  |
| 25 | 1 | 0 | 3.067941  | -0.056961 | 1.190061  |
| 26 | 1 | 0 | 3.237527  | -1.032528 | -1.062356 |
| 27 | 1 | 0 | 2.976104  | -2.262889 | 0.154360  |
| 28 | 1 | 0 | 0.962630  | -1.274966 | -1.971925 |
| 29 | 1 | 0 | -1.122656 | -0.634451 | 0.233308  |
| 30 | 1 | 0 | -0.373715 | -0.290790 | 1.766411  |
| 31 | 1 | 0 | -2.754215 | 0.318550  | 2.042978  |
| 32 | 1 | 0 | -4.203245 | 2.193005  | 2.352534  |
| 33 | 1 | 0 | -3.384259 | 3.760710  | 2.221018  |
| 34 | 1 | 0 | -4.336274 | 3.157503  | 0.867811  |
| 35 | 1 | 0 | 1.274130  | -5.111618 | -0.536127 |
| 36 | 1 | 0 | 1.818163  | -3.906551 | 0.639523  |
| 37 | 1 | 0 | 0.122301  | -4.412376 | 0.589339  |
| 38 | 1 | 0 | -0.253591 | -4.382164 | -2.532694 |
| 39 | 1 | 0 | -1.399150 | -3.688531 | -1.395948 |
| 40 | 1 | 0 | -0.704741 | -2.674623 | -2.682017 |

-----  
 SCF Done: E(RB+HF-LYP) = -586.350482839 A.U. after 1 cycles

Frequencies -- -522.5457 29.3134 40.5082

Zero-point correction= 0.363077 (Hartree/Particle)

Thermal correction to Energy= 0.380476

Thermal correction to Enthalpy= 0.381421

Thermal correction to Gibbs Free Energy= 0.317184

Sum of electronic and zero-point Energies= -585.987406

Sum of electronic and thermal Energies= -585.970006

Sum of electronic and thermal Enthalpies= -585.969062

Sum of electronic and thermal Free Energies= -586.033299

mpw1pw91/6-311+G(2d,p)//B3LYP/6-31G\*

DFT = -586.374902

DFT + ZPE = -586.01183

.....  
**(1R, 4S, 5S)- $\alpha$ -acorenyl cation (lower energy conformer – product of IRC)**



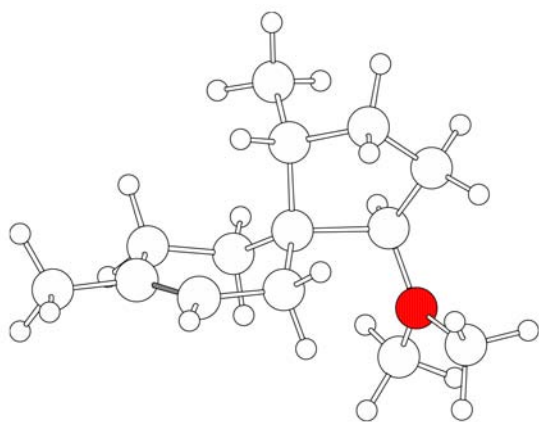

-----  
 #6-31g\* b3lyp nopop freq guess=read geom=check  
 -----

Charge = 1 Multiplicity = 1  
 -----

|    |   |   |           |           |           |
|----|---|---|-----------|-----------|-----------|
| 1  | 6 | 0 | -2.530442 | -0.063980 | -0.165330 |
| 2  | 6 | 0 | -1.246163 | -0.923381 | -0.118245 |
| 3  | 6 | 0 | -2.453121 | 1.187110  | 0.679010  |
| 4  | 6 | 0 | -3.745432 | 1.926885  | 0.896253  |
| 5  | 6 | 0 | -1.285146 | 1.613336  | 1.180740  |
| 6  | 6 | 0 | 0.031777  | 0.894658  | 1.002754  |
| 7  | 6 | 0 | 0.001588  | -0.043136 | -0.222096 |
| 8  | 6 | 0 | 0.170697  | 0.734686  | -1.568419 |
| 9  | 6 | 0 | 1.654787  | 1.134138  | -1.619467 |
| 10 | 6 | 0 | -0.239891 | -0.047562 | -2.825913 |
| 11 | 6 | 0 | 2.434080  | -0.100514 | -1.114052 |
| 12 | 6 | 0 | 1.434277  | -0.993549 | -0.339366 |
| 13 | 6 | 0 | 1.768755  | -1.481120 | 0.965501  |
| 14 | 6 | 0 | 2.762256  | -0.810667 | 1.838525  |
| 15 | 6 | 0 | 1.139525  | -2.713373 | 1.496425  |
| 16 | 1 | 0 | -2.758400 | 0.219338  | -1.202616 |
| 17 | 1 | 0 | -3.378461 | -0.681328 | 0.158652  |
| 18 | 1 | 0 | -1.275635 | -1.675743 | -0.912876 |
| 19 | 1 | 0 | -1.236684 | -1.462091 | 0.836792  |
| 20 | 1 | 0 | -3.599295 | 2.838311  | 1.482412  |
| 21 | 1 | 0 | -4.474976 | 1.295348  | 1.420283  |
| 22 | 1 | 0 | -4.205337 | 2.206262  | -0.061026 |
| 23 | 1 | 0 | -1.253469 | 2.524924  | 1.773841  |
| 24 | 1 | 0 | 0.244132  | 0.315453  | 1.916039  |
| 25 | 1 | 0 | 0.841752  | 1.629255  | 0.924570  |
| 26 | 1 | 0 | -0.463077 | 1.626675  | -1.493443 |
| 27 | 1 | 0 | 1.962765  | 1.423325  | -2.628139 |
| 28 | 1 | 0 | 1.848493  | 1.997339  | -0.975365 |
| 29 | 1 | 0 | -0.087798 | 0.583683  | -3.707270 |
| 30 | 1 | 0 | -1.293240 | -0.339528 | -2.817493 |

|    |   |   |          |           |           |
|----|---|---|----------|-----------|-----------|
| 31 | 1 | 0 | 0.359228 | -0.954407 | -2.976291 |
| 32 | 1 | 0 | 3.298356 | 0.188203  | -0.511318 |
| 33 | 1 | 0 | 2.827943 | -0.695197 | -1.944290 |
| 34 | 1 | 0 | 1.065235 | -1.820237 | -0.953070 |
| 35 | 1 | 0 | 3.749773 | -1.230248 | 1.576510  |
| 36 | 1 | 0 | 2.598978 | -1.023326 | 2.898444  |
| 37 | 1 | 0 | 2.831556 | 0.265299  | 1.664168  |
| 38 | 1 | 0 | 0.465558 | -3.203869 | 0.794160  |
| 39 | 1 | 0 | 0.611269 | -2.490670 | 2.435437  |
| 40 | 1 | 0 | 1.936043 | -3.417963 | 1.783968  |

-----

SCF Done: E(RB+HF-LYP) = -586.375831628 A.U. after 1 cycles  
 Frequencies -- 48.4539 78.0842 109.4122  
 Zero-point correction= 0.368243 (Hartree/Particle)  
 Thermal correction to Energy= 0.384587  
 Thermal correction to Enthalpy= 0.385531  
 Thermal correction to Gibbs Free Energy= 0.326229  
 Sum of electronic and zero-point Energies= -586.007589  
 Sum of electronic and thermal Energies= -585.991245  
 Sum of electronic and thermal Enthalpies= -585.990300  
 Sum of electronic and thermal Free Energies= -586.049603

mpw1pw91/6-311+G(2d,p)//B3LYP/6-31G\*

DFT = -586.396703994  
 DFT + ZPE = -586.02846

.....

**(1R, 4S, 5S)- $\alpha$ -acorenyl cation (higher energy conformer)**

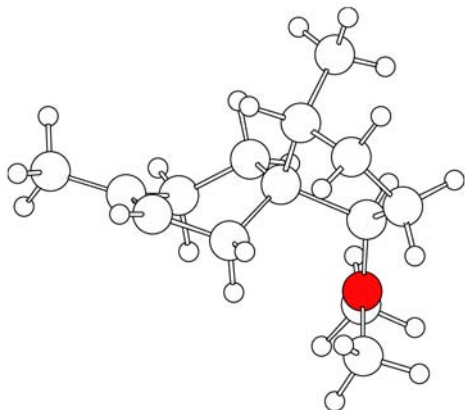

#6-31g\* b3lyp nopop freq guess=read geom=check

-----  
Charge = 1 Multiplicity = 1  
-----

|    |   |   |           |           |           |
|----|---|---|-----------|-----------|-----------|
| 1  | 6 | 0 | -2.124372 | 0.019614  | -1.202851 |
| 2  | 6 | 0 | -2.053748 | -0.095947 | 1.218347  |
| 3  | 6 | 0 | -0.638883 | -0.574688 | 1.011135  |
| 4  | 6 | 0 | 0.121180  | 0.390155  | 0.058788  |
| 5  | 6 | 0 | 1.650869  | -0.285408 | -0.407580 |
| 6  | 6 | 0 | -0.757695 | 0.736032  | -1.172907 |
| 7  | 6 | 0 | 2.608148  | 0.093232  | 0.748982  |
| 8  | 6 | 0 | 1.860023  | 1.082476  | 1.671400  |
| 9  | 6 | 0 | 0.689637  | 1.625102  | 0.834505  |
| 10 | 6 | 0 | 1.140540  | 2.810336  | -0.034329 |
| 11 | 6 | 0 | 1.476731  | -1.661541 | -0.762730 |
| 12 | 6 | 0 | -2.811955 | 0.157302  | 0.139989  |
| 13 | 6 | 0 | -4.253510 | 0.569065  | 0.189691  |
| 14 | 6 | 0 | 1.706441  | -2.770378 | 0.197004  |
| 15 | 6 | 0 | 1.121070  | -2.046016 | -2.151060 |
| 16 | 1 | 0 | -1.999445 | -1.047579 | -1.447229 |
| 17 | 1 | 0 | -2.730467 | 0.444922  | -2.009431 |
| 18 | 1 | 0 | -2.441847 | -0.005710 | 2.229278  |
| 19 | 1 | 0 | -0.115837 | -0.690376 | 1.963534  |
| 20 | 1 | 0 | -0.676436 | -1.575184 | 0.553788  |
| 21 | 1 | 0 | 1.848342  | 0.305055  | -1.306259 |
| 22 | 1 | 0 | -0.965730 | 1.808538  | -1.142317 |
| 23 | 1 | 0 | -0.221417 | 0.577308  | -2.114333 |
| 24 | 1 | 0 | 3.493428  | 0.553970  | 0.298918  |
| 25 | 1 | 0 | 2.968743  | -0.776901 | 1.302818  |
| 26 | 1 | 0 | 1.499058  | 0.569363  | 2.567559  |
| 27 | 1 | 0 | 2.516123  | 1.885398  | 2.018544  |
| 28 | 1 | 0 | -0.125533 | 1.970128  | 1.484855  |
| 29 | 1 | 0 | 0.322391  | 3.260280  | -0.602674 |
| 30 | 1 | 0 | 1.930823  | 2.539066  | -0.745528 |
| 31 | 1 | 0 | 1.547459  | 3.592919  | 0.613602  |
| 32 | 1 | 0 | -4.624715 | 0.627387  | 1.216741  |
| 33 | 1 | 0 | -4.400900 | 1.547580  | -0.286912 |
| 34 | 1 | 0 | -4.882376 | -0.142797 | -0.361566 |
| 35 | 1 | 0 | 2.760327  | -3.080324 | 0.081396  |
| 36 | 1 | 0 | 1.097223  | -3.649191 | -0.031493 |
| 37 | 1 | 0 | 1.582013  | -2.474973 | 1.239944  |
| 38 | 1 | 0 | 0.837079  | -1.202469 | -2.781014 |
| 39 | 1 | 0 | 0.353844  | -2.827967 | -2.174730 |
| 40 | 1 | 0 | 2.020990  | -2.504454 | -2.597797 |

-----  
SCF Done: E(RB+HF-LYP) = -586.366027117 A.U. after 1 cycles  
Frequencies -- 27.1277 42.9804 79.6402  
Zero-point correction= 0.367584 (Hartree/Particle)  
Thermal correction to Energy= 0.384217

Thermal correction to Enthalpy= 0.385162  
 Thermal correction to Gibbs Free Energy= 0.324108  
 Sum of electronic and zero-point Energies= -585.998443  
 Sum of electronic and thermal Energies= -585.981810  
 Sum of electronic and thermal Enthalpies= -585.980865  
 Sum of electronic and thermal Free Energies= -586.041919

mpw1pw91/6-311+G(2d,p)//B3LYP/6-31G\*

DFT = -586.386818366  
 DFT + ZPE = -586.01923

.....

**(1R, 4R, 5S)-a-acorenyl cation**

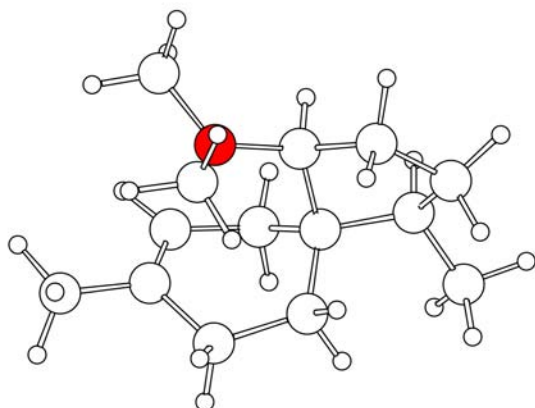

-----  
 #6-31g\* b3lyp nopop freq geom=check guess=read  
 -----

Charge = 1 Multiplicity = 1

|    |   |   |           |           |           |
|----|---|---|-----------|-----------|-----------|
| 1  | 6 | 0 | 0.878929  | -1.519695 | -1.308397 |
| 2  | 6 | 0 | 1.265495  | -1.126303 | 1.108581  |
| 3  | 6 | 0 | -0.214638 | -1.203371 | 1.335926  |
| 4  | 6 | 0 | -0.907431 | -0.374892 | 0.241594  |
| 5  | 6 | 0 | -0.580158 | -0.997002 | -1.136562 |
| 6  | 6 | 0 | -2.698209 | 1.180231  | -0.375570 |
| 7  | 6 | 0 | -1.346478 | 1.950563  | -0.450360 |
| 8  | 6 | 0 | -2.430908 | -0.117818 | 0.431028  |
| 9  | 6 | 0 | -3.386347 | -1.266814 | 0.099220  |
| 10 | 6 | 0 | 1.795946  | -1.251214 | -0.143130 |
| 11 | 6 | 0 | 3.275078  | -1.321832 | -0.382065 |
| 12 | 6 | 0 | -0.376852 | 1.104628  | 0.426142  |
| 13 | 6 | 0 | 1.084859  | 1.294592  | 0.229833  |
| 14 | 6 | 0 | 1.640231  | 1.580747  | -1.125363 |
| 15 | 6 | 0 | 1.899574  | 1.813942  | 1.372526  |
| 16 | 1 | 0 | 0.862714  | -2.610715 | -1.444803 |
| 17 | 1 | 0 | 1.330924  | -1.135558 | -2.229926 |

|    |   |   |           |           |           |
|----|---|---|-----------|-----------|-----------|
| 18 | 1 | 0 | 1.932639  | -1.047006 | 1.964268  |
| 19 | 1 | 0 | -0.479926 | -0.845206 | 2.336423  |
| 20 | 1 | 0 | -0.547277 | -2.251280 | 1.280197  |
| 21 | 1 | 0 | -0.818816 | -0.290670 | -1.938036 |
| 22 | 1 | 0 | -1.260701 | -1.839733 | -1.279695 |
| 23 | 1 | 0 | -3.050710 | 0.939420  | -1.384345 |
| 24 | 1 | 0 | -3.481831 | 1.781216  | 0.094014  |
| 25 | 1 | 0 | -1.415124 | 2.971081  | -0.062560 |
| 26 | 1 | 0 | -0.995654 | 2.024761  | -1.483293 |
| 27 | 1 | 0 | -2.560580 | 0.115967  | 1.497846  |
| 28 | 1 | 0 | -3.132636 | -2.181422 | 0.647659  |
| 29 | 1 | 0 | -4.407634 | -0.992261 | 0.383357  |
| 30 | 1 | 0 | -3.401908 | -1.500575 | -0.970655 |
| 31 | 1 | 0 | 3.856110  | -1.078465 | 0.512034  |
| 32 | 1 | 0 | 3.590303  | -0.670984 | -1.206649 |
| 33 | 1 | 0 | 3.544632  | -2.342665 | -0.686461 |
| 34 | 1 | 0 | -0.591838 | 1.341759  | 1.475052  |
| 35 | 1 | 0 | 1.492790  | 2.662901  | -1.281804 |
| 36 | 1 | 0 | 2.716753  | 1.406137  | -1.185860 |
| 37 | 1 | 0 | 1.123272  | 1.075511  | -1.940894 |
| 38 | 1 | 0 | 1.545113  | 1.472527  | 2.346535  |
| 39 | 1 | 0 | 2.967665  | 1.608350  | 1.262049  |
| 40 | 1 | 0 | 1.787171  | 2.912334  | 1.355131  |

-----

SCF Done: E(RB+HF-LYP) = -586.381341674 A.U. after 1 cycles  
Frequencies -- 79.8947 82.1013 101.8161  
Zero-point correction= 0.369611 (Hartree/Particle)  
Thermal correction to Energy= 0.385474  
Thermal correction to Enthalpy= 0.386419  
Thermal correction to Gibbs Free Energy= 0.328742  
Sum of electronic and zero-point Energies= -586.011730  
Sum of electronic and thermal Energies= -585.995867  
Sum of electronic and thermal Enthalpies= -585.994923  
Sum of electronic and thermal Free Energies= -586.052600

mpw1pw91/6-311+G(2d,p)//B3LYP/6-31G\*

DFT = -586.403228493  
DFT + ZPE = -586.03362

.....

**Tertiary carbocation precursor to (+)-2-epi-prezizaene**

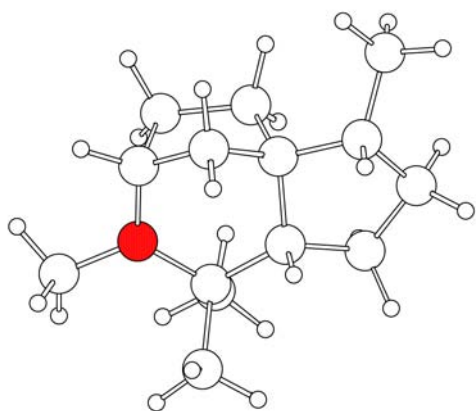

-----  
 #6-31g\* b3lyp nopop freq guess=read geom=check  
 -----

Charge = 1 Multiplicity = 1

-----

|    |   |   |           |           |           |
|----|---|---|-----------|-----------|-----------|
| 1  | 6 | 0 | -0.517646 | -1.839934 | 1.112556  |
| 2  | 6 | 0 | 0.806011  | -1.046329 | 1.189215  |
| 3  | 6 | 0 | -0.980237 | -1.698530 | -0.449070 |
| 4  | 6 | 0 | 0.368955  | -1.437998 | -1.137265 |
| 5  | 6 | 0 | -1.861305 | -0.567182 | -0.237711 |
| 6  | 6 | 0 | -3.316075 | -0.851440 | -0.161030 |
| 7  | 6 | 0 | -1.338491 | 0.833152  | -0.065420 |
| 8  | 6 | 0 | -2.113601 | 1.723041  | -1.097871 |
| 9  | 6 | 0 | 0.195754  | 0.919587  | -0.369974 |
| 10 | 6 | 0 | -1.720950 | 1.352317  | 1.358257  |
| 11 | 6 | 0 | 1.001535  | -0.398121 | -0.207549 |
| 12 | 6 | 0 | 2.434495  | 0.092165  | -0.530635 |
| 13 | 6 | 0 | 2.516224  | 1.491991  | 0.145160  |
| 14 | 6 | 0 | 3.589340  | -0.844209 | -0.171066 |
| 15 | 6 | 0 | 1.052091  | 1.978108  | 0.358472  |
| 16 | 1 | 0 | -0.403509 | -2.920266 | 1.245595  |
| 17 | 1 | 0 | -1.269960 | -1.520389 | 1.840877  |
| 18 | 1 | 0 | 1.622665  | -1.743438 | 1.396722  |
| 19 | 1 | 0 | 0.799067  | -0.316699 | 2.003306  |
| 20 | 1 | 0 | -1.514554 | -2.595564 | -0.767935 |
| 21 | 1 | 0 | 0.253006  | -1.086339 | -2.167914 |
| 22 | 1 | 0 | 0.929191  | -2.379762 | -1.166638 |
| 23 | 1 | 0 | -3.907758 | -0.092380 | 0.349089  |
| 24 | 1 | 0 | -3.512842 | -1.842057 | 0.261258  |
| 25 | 1 | 0 | -3.663905 | -0.901920 | -1.207920 |
| 26 | 1 | 0 | -1.678349 | 2.725840  | -1.050251 |
| 27 | 1 | 0 | -3.178638 | 1.805030  | -0.866678 |
| 28 | 1 | 0 | -1.997450 | 1.356854  | -2.122832 |
| 29 | 1 | 0 | 0.268053  | 1.152562  | -1.441874 |
| 30 | 1 | 0 | -1.462979 | 2.412451  | 1.413649  |
| 31 | 1 | 0 | -1.179671 | 0.830436  | 2.150484  |

|    |   |   |           |           |           |
|----|---|---|-----------|-----------|-----------|
| 32 | 1 | 0 | -2.792265 | 1.264141  | 1.553838  |
| 33 | 1 | 0 | 2.458775  | 0.242754  | -1.619753 |
| 34 | 1 | 0 | 3.035965  | 1.420923  | 1.106886  |
| 35 | 1 | 0 | 3.093713  | 2.188443  | -0.469259 |
| 36 | 1 | 0 | 4.536461  | -0.428466 | -0.530618 |
| 37 | 1 | 0 | 3.475215  | -1.833141 | -0.631201 |
| 38 | 1 | 0 | 3.687837  | -0.979109 | 0.912074  |
| 39 | 1 | 0 | 0.882627  | 2.985382  | -0.034758 |
| 40 | 1 | 0 | 0.822708  | 2.015012  | 1.427440  |

-----  
SCF Done: E(RB+HF-LYP) = -586.385770487 A.U. after 6 cycles  
Frequencies -- 65.1480 75.6308 102.3592  
Zero-point correction= 0.371457 (Hartree/Particle)  
Thermal correction to Energy= 0.386534  
Thermal correction to Enthalpy= 0.387479  
Thermal correction to Gibbs Free Energy= 0.331410  
Sum of electronic and zero-point Energies= -586.014313  
Sum of electronic and thermal Energies= -585.999236  
Sum of electronic and thermal Enthalpies= -585.998292  
Sum of electronic and thermal Free Energies= -586.054361

mpw1pw91/6-311+G(2d,p)//B3LYP/6-31G\*

DFT = -586.413165107  
DFT + ZPE = -586.04171

.....

**Precursor tertiary carbocation to (-)- $\alpha$ -cedrene (higher energy conformer, “product of irc”)**

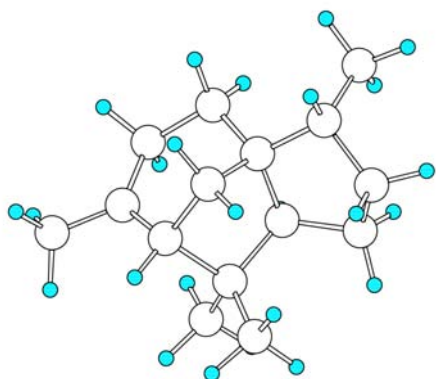

-----  
 #6-31g\* b3lyp nopop freq guess=read geom=check  
 -----

Charge = 1 Multiplicity = 1  
 -----

|    |   |   |           |           |           |
|----|---|---|-----------|-----------|-----------|
| 1  | 6 | 0 | -1.986145 | -0.560007 | -1.114734 |
| 2  | 6 | 0 | -0.781513 | 0.086170  | -1.838199 |
| 3  | 6 | 0 | -2.217552 | -0.185175 | 0.297395  |
| 4  | 6 | 0 | -3.503960 | -0.541928 | 0.925710  |
| 5  | 6 | 0 | -1.185848 | 0.486173  | 1.053205  |
| 6  | 6 | 0 | -0.406203 | 1.477554  | 0.162920  |
| 7  | 6 | 0 | 0.301039  | 0.549500  | -0.844947 |
| 8  | 6 | 0 | 1.559341  | 1.212918  | -1.478450 |
| 9  | 6 | 0 | 2.643086  | 0.963292  | -0.403848 |
| 10 | 6 | 0 | 1.967247  | 0.640631  | -2.845117 |
| 11 | 6 | 0 | 2.367337  | -0.464735 | 0.104850  |
| 12 | 6 | 0 | 0.822117  | -0.642151 | 0.039375  |
| 13 | 6 | 0 | 0.016973  | -0.622800 | 1.389883  |
| 14 | 6 | 0 | 0.758609  | -0.028554 | 2.602065  |
| 15 | 6 | 0 | -0.500501 | -2.011915 | 1.788301  |
| 16 | 1 | 0 | -2.930420 | -0.466980 | -1.671180 |
| 17 | 1 | 0 | -1.855232 | -1.659683 | -1.050131 |
| 18 | 1 | 0 | -1.136859 | 0.941965  | -2.424643 |
| 19 | 1 | 0 | -0.378699 | -0.636733 | -2.552875 |
| 20 | 1 | 0 | -3.397150 | -0.765693 | 1.992025  |
| 21 | 1 | 0 | -4.040986 | -1.337414 | 0.402254  |
| 22 | 1 | 0 | -4.131464 | 0.367131  | 0.870340  |
| 23 | 1 | 0 | -1.569396 | 0.875362  | 1.999477  |
| 24 | 1 | 0 | 0.292214  | 2.037442  | 0.789229  |
| 25 | 1 | 0 | -1.058101 | 2.210797  | -0.324916 |
| 26 | 1 | 0 | 1.381796  | 2.288895  | -1.605625 |
| 27 | 1 | 0 | 3.656736  | 1.077380  | -0.800267 |
| 28 | 1 | 0 | 2.543771  | 1.687553  | 0.413951  |
| 29 | 1 | 0 | 2.891249  | 1.119387  | -3.184750 |
| 30 | 1 | 0 | 1.207561  | 0.824774  | -3.611888 |
| 31 | 1 | 0 | 2.153104  | -0.439438 | -2.808477 |
| 32 | 1 | 0 | 2.793615  | -0.648743 | 1.093574  |



|    |   |   |           |           |           |
|----|---|---|-----------|-----------|-----------|
| 33 | 1 | 0 | 2.829825  | -1.194593 | -0.567190 |
| 34 | 1 | 0 | 0.602618  | -1.596704 | -0.452522 |
| 35 | 1 | 0 | 0.089492  | 0.053443  | 3.464510  |
| 36 | 1 | 0 | 1.196624  | 0.953479  | 2.410095  |
| 37 | 1 | 0 | 1.571446  | -0.703100 | 2.889735  |
| 38 | 1 | 0 | -1.058526 | -2.514408 | 0.989941  |
| 39 | 1 | 0 | -1.131896 | -1.973863 | 2.683114  |
| 40 | 1 | 0 | 0.354508  | -2.654094 | 2.025771  |

-----  
 SCF Done: E(RB+HF-LYP) = -586.390371153 A.U. after 1 cycles  
 Frequencies -- 68.7704 79.1418 130.8598  
 Zero-point correction= 0.370146 (Hartree/Particle)  
 Thermal correction to Energy= 0.385171  
 Thermal correction to Enthalpy= 0.386115  
 Thermal correction to Gibbs Free Energy= 0.330378  
 Sum of electronic and zero-point Energies= -586.020225  
 Sum of electronic and thermal Energies= -586.005200  
 Sum of electronic and thermal Enthalpies= -586.004256  
 Sum of electronic and thermal Free Energies= -586.059993

mpw1pw91/6-311+G(2d,p)//B3LYP/6-31G\*

DFT = -586.41745987  
 DFT + ZPE = -586.04731

-----  
**Precursor tertiary carbocation to (-)- $\alpha$ -cedrene (lower energy conformer)**

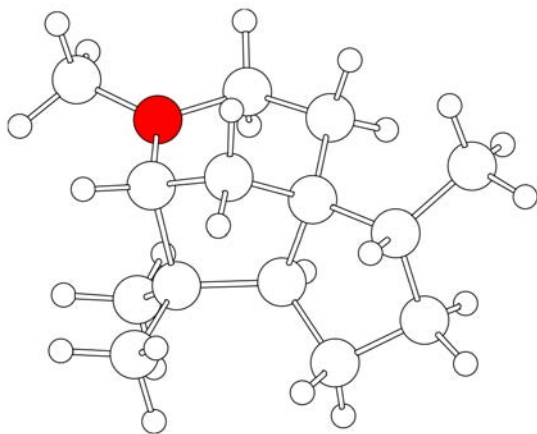

-----  
 #6-31g\* b3lyp nopop freq guess=read geom=check

-----  
 Charge = 1 Multiplicity = 1

-----  
 1 6 0 0.821187 0.289456 0.500298

|    |   |   |           |           |           |
|----|---|---|-----------|-----------|-----------|
| 2  | 6 | 0 | 0.364616  | -0.936578 | -0.372277 |
| 3  | 6 | 0 | 2.061042  | -0.207464 | 1.320939  |
| 4  | 6 | 0 | -0.421672 | 0.625114  | 1.344176  |
| 5  | 6 | 0 | 1.088959  | 1.515098  | -0.396968 |
| 6  | 6 | 0 | 3.200193  | 0.791402  | 1.543670  |
| 7  | 6 | 0 | 2.489910  | -1.502350 | 0.596856  |
| 8  | 6 | 0 | 1.161502  | -2.145010 | 0.168687  |
| 9  | 6 | 0 | -0.151810 | 1.894869  | -1.237343 |
| 10 | 6 | 0 | -1.576245 | 0.496919  | 0.325213  |
| 11 | 6 | 0 | -1.199763 | -0.985364 | -0.373557 |
| 12 | 6 | 0 | -1.828821 | -2.023515 | 0.572190  |
| 13 | 6 | 0 | -1.791504 | -1.202568 | -1.772715 |
| 14 | 6 | 0 | -1.476407 | 1.486735  | -0.718913 |
| 15 | 6 | 0 | -2.686647 | 2.077676  | -1.321974 |
| 16 | 1 | 0 | 0.697982  | -0.779866 | -1.406489 |
| 17 | 1 | 0 | 1.685056  | -0.502276 | 2.311104  |
| 18 | 1 | 0 | -0.583019 | -0.095277 | 2.150127  |
| 19 | 1 | 0 | -0.378271 | 1.618289  | 1.805344  |
| 20 | 1 | 0 | 1.372971  | 2.374244  | 0.220211  |
| 21 | 1 | 0 | 1.925935  | 1.329945  | -1.077592 |
| 22 | 1 | 0 | 3.988349  | 0.326722  | 2.145155  |
| 23 | 1 | 0 | 2.866672  | 1.685399  | 2.083127  |
| 24 | 1 | 0 | 3.658684  | 1.112529  | 0.601638  |
| 25 | 1 | 0 | 3.097346  | -1.257758 | -0.285792 |
| 26 | 1 | 0 | 3.095320  | -2.156211 | 1.232607  |
| 27 | 1 | 0 | 0.673815  | -2.588065 | 1.043725  |
| 28 | 1 | 0 | 1.281619  | -2.938455 | -0.575611 |
| 29 | 1 | 0 | -0.183423 | 2.961091  | -1.505434 |
| 30 | 1 | 0 | -0.119226 | 1.400124  | -2.229148 |
| 31 | 1 | 0 | -2.587335 | 0.435816  | 0.735506  |
| 32 | 1 | 0 | -1.537602 | -3.024717 | 0.235694  |
| 33 | 1 | 0 | -2.921487 | -1.968839 | 0.537306  |
| 34 | 1 | 0 | -1.511980 | -1.921582 | 1.612424  |
| 35 | 1 | 0 | -2.884754 | -1.129005 | -1.772807 |
| 36 | 1 | 0 | -1.538762 | -2.214294 | -2.108058 |
| 37 | 1 | 0 | -1.395887 | -0.514010 | -2.527796 |
| 38 | 1 | 0 | -2.975215 | 2.915585  | -0.660214 |
| 39 | 1 | 0 | -3.535336 | 1.386688  | -1.317227 |
| 40 | 1 | 0 | -2.518684 | 2.497405  | -2.317481 |

-----  
SCF Done: E(RB+HF-LYP) = -586.391511674 A.U. after 1 cycles  
Frequencies -- 63.1134 79.6270 139.0493  
Zero-point correction= 0.370440 (Hartree/Particle)  
Thermal correction to Energy= 0.385371  
Thermal correction to Enthalpy= 0.386315  
Thermal correction to Gibbs Free Energy= 0.330835  
Sum of electronic and zero-point Energies= -586.021071  
Sum of electronic and thermal Energies= -586.006140  
Sum of electronic and thermal Enthalpies= -586.005196

Sum of electronic and thermal Free Energies= -586.060677

mpw1pw91/6-311+G(2d,p)//B3LYP/6-31G\*

DFT = -586.422749615

DFT + ZPE = -586.05231

.....  
**15 - Transition state linking (1R, 4R, 5S)-a-acorenyl cation to the tertiary carbocation precursor to (+)-2-epi-prezizaene**

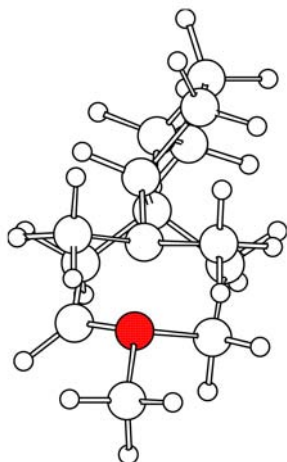

-----  
#6-31g\* b3lyp nopop freq guess=read geom=check  
-----

Charge = 1 Multiplicity = 1

|    |   |   |           |           |           |
|----|---|---|-----------|-----------|-----------|
| 1  | 6 | 0 | -0.075792 | -0.059851 | 2.022135  |
| 2  | 6 | 0 | 0.135954  | -1.986766 | 0.648942  |
| 3  | 6 | 0 | 1.285919  | -1.393393 | -0.032680 |
| 4  | 6 | 0 | 1.058069  | 0.101099  | -0.234890 |
| 5  | 6 | 0 | 0.925973  | 0.743102  | 1.171389  |
| 6  | 6 | 0 | 1.235805  | 2.031866  | -1.715148 |
| 7  | 6 | 0 | -0.273333 | 1.692351  | -1.531922 |
| 8  | 6 | 0 | 2.046731  | 0.815643  | -1.186074 |
| 9  | 6 | 0 | 3.418703  | 1.177587  | -0.612730 |
| 10 | 6 | 0 | -0.894200 | -1.138354 | 1.156151  |
| 11 | 6 | 0 | -1.952040 | -1.860305 | 1.994654  |
| 12 | 6 | 0 | -0.296337 | 0.242909  | -0.988298 |
| 13 | 6 | 0 | -1.511909 | -0.266034 | -0.157045 |
| 14 | 6 | 0 | -2.412993 | 0.848329  | 0.392092  |
| 15 | 6 | 0 | -2.377840 | -1.223571 | -0.998424 |
| 16 | 1 | 0 | 0.417704  | -0.594241 | 2.839042  |
| 17 | 1 | 0 | -0.845327 | 0.566078  | 2.480791  |
| 18 | 1 | 0 | 0.101730  | -3.070760 | 0.791232  |
| 19 | 1 | 0 | 1.478815  | -1.952873 | -0.965237 |

|    |   |   |           |           |           |
|----|---|---|-----------|-----------|-----------|
| 20 | 1 | 0 | 2.176810  | -1.636461 | 0.583700  |
| 21 | 1 | 0 | 0.603024  | 1.783226  | 1.072875  |
| 22 | 1 | 0 | 1.900232  | 0.764701  | 1.668548  |
| 23 | 1 | 0 | 1.494455  | 2.933971  | -1.149814 |
| 24 | 1 | 0 | 1.487426  | 2.239505  | -2.758841 |
| 25 | 1 | 0 | -0.835386 | 1.769361  | -2.467263 |
| 26 | 1 | 0 | -0.734494 | 2.395321  | -0.833987 |
| 27 | 1 | 0 | 2.207591  | 0.128426  | -2.030149 |
| 28 | 1 | 0 | 3.951596  | 0.298473  | -0.229133 |
| 29 | 1 | 0 | 4.047750  | 1.619772  | -1.392110 |
| 30 | 1 | 0 | 3.343192  | 1.911075  | 0.197556  |
| 31 | 1 | 0 | -2.426549 | -2.675109 | 1.440877  |
| 32 | 1 | 0 | -2.734762 | -1.176075 | 2.328275  |
| 33 | 1 | 0 | -1.493590 | -2.287856 | 2.892930  |
| 34 | 1 | 0 | -0.215176 | -0.420945 | -1.860822 |
| 35 | 1 | 0 | -2.890288 | 1.343936  | -0.460815 |
| 36 | 1 | 0 | -3.216723 | 0.451658  | 1.017735  |
| 37 | 1 | 0 | -1.883865 | 1.620874  | 0.953943  |
| 38 | 1 | 0 | -1.808853 | -2.085468 | -1.365879 |
| 39 | 1 | 0 | -3.248192 | -1.592476 | -0.448681 |
| 40 | 1 | 0 | -2.753385 | -0.681777 | -1.873688 |

-----  
SCF Done: E(RB+HF-LYP) = -586.367407599 A.U. after 1 cycles  
Frequencies -- -248.5415 70.6111 90.0784  
Zero-point correction= 0.369393 (Hartree/Particle)  
Thermal correction to Energy= 0.383950  
Thermal correction to Enthalpy= 0.384894  
Thermal correction to Gibbs Free Energy= 0.330413  
Sum of electronic and zero-point Energies= -585.998014  
Sum of electronic and thermal Energies= -585.983457  
Sum of electronic and thermal Enthalpies= -585.982513  
Sum of electronic and thermal Free Energies= -586.036995

mpw1pw91/6-311+G(2d,p)//B3LYP/6-31G\*

DFT = -586.394419128  
DFT + ZPE = -586.02503

.....  
**Transition state linking (1R, 4S, 5S)- $\alpha$ -acorenyl cation to the tertiary carbocation precursor to (-)- $\alpha$ -cedrene**

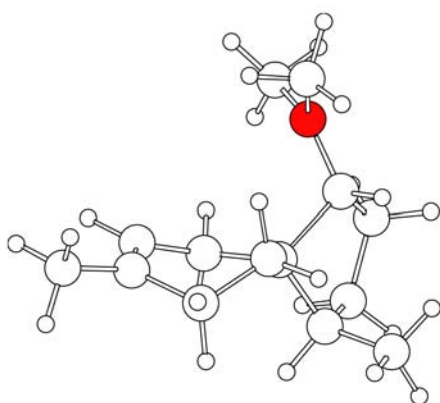

-----  
 #6-31g\* b3lyp nopop freq(noraman) guess=read geom=check  
 -----

Charge = 1 Multiplicity = 1

|    |   |   |           |           |           |
|----|---|---|-----------|-----------|-----------|
| 1  | 6 | 0 | -2.381569 | -0.765704 | -0.505685 |
| 2  | 6 | 0 | -1.221983 | -0.759414 | 0.507604  |
| 3  | 6 | 0 | -2.465895 | 0.584853  | -1.186299 |
| 4  | 6 | 0 | -3.826515 | 1.140148  | -1.500233 |
| 5  | 6 | 0 | -1.321463 | 1.223172  | -1.464169 |
| 6  | 6 | 0 | 0.036284  | 0.581207  | -1.287873 |
| 7  | 6 | 0 | 0.131497  | -0.498174 | -0.163500 |
| 8  | 6 | 0 | 0.880849  | -1.765932 | -0.699003 |
| 9  | 6 | 0 | 2.338205  | -1.304540 | -0.874395 |
| 10 | 6 | 0 | 0.778753  | -3.036591 | 0.155571  |
| 11 | 6 | 0 | 2.660327  | -0.441080 | 0.370295  |
| 12 | 6 | 0 | 1.313614  | -0.084241 | 1.041780  |
| 13 | 6 | 0 | 1.087479  | 1.236292  | 1.547910  |
| 14 | 6 | 0 | 1.806320  | 2.428771  | 1.041206  |
| 15 | 6 | 0 | 0.118136  | 1.480465  | 2.643024  |
| 16 | 1 | 0 | -2.257955 | -1.569703 | -1.246353 |
| 17 | 1 | 0 | -3.311699 | -0.989663 | 0.029079  |
| 18 | 1 | 0 | -1.190118 | -1.690330 | 1.079792  |
| 19 | 1 | 0 | -1.452482 | 0.040418  | 1.217279  |
| 20 | 1 | 0 | -3.765496 | 2.114785  | -1.993047 |
| 21 | 1 | 0 | -4.432644 | 1.249048  | -0.590879 |
| 22 | 1 | 0 | -4.379365 | 0.460037  | -2.161992 |
| 23 | 1 | 0 | -1.336675 | 2.196860  | -1.949847 |
| 24 | 1 | 0 | 0.802032  | 1.354268  | -1.183351 |
| 25 | 1 | 0 | 0.296797  | 0.085510  | -2.234277 |
| 26 | 1 | 0 | 0.432681  | -1.989236 | -1.676572 |
| 27 | 1 | 0 | 3.023800  | -2.150415 | -0.973113 |
| 28 | 1 | 0 | 2.444422  | -0.703642 | -1.782884 |
| 29 | 1 | 0 | 1.372668  | -3.827489 | -0.313858 |
| 30 | 1 | 0 | -0.246694 | -3.408836 | 0.231986  |
| 31 | 1 | 0 | 1.169396  | -2.908115 | 1.172616  |

|    |   |   |           |           |          |
|----|---|---|-----------|-----------|----------|
| 32 | 1 | 0 | 3.243024  | 0.442651  | 0.099417 |
| 33 | 1 | 0 | 3.260190  | -0.989549 | 1.103852 |
| 34 | 1 | 0 | 1.039896  | -0.813690 | 1.809422 |
| 35 | 1 | 0 | 2.711561  | 2.536120  | 1.665477 |
| 36 | 1 | 0 | 1.227881  | 3.348303  | 1.170185 |
| 37 | 1 | 0 | 2.158820  | 2.330112  | 0.012860 |
| 38 | 1 | 0 | -0.244661 | 0.573467  | 3.126192 |
| 39 | 1 | 0 | -0.735782 | 2.046921  | 2.236685 |
| 40 | 1 | 0 | 0.566153  | 2.146771  | 3.393924 |

-----  
SCF Done: E(RB+HF-LYP) = -586.366331328 A.U. after 1 cycles  
Frequencies -- -55.6163 23.9536 113.6646  
Zero-point correction= 0.367854 (Hartree/Particle)  
Thermal correction to Energy= 0.383462  
Thermal correction to Enthalpy= 0.384406  
Thermal correction to Gibbs Free Energy= 0.326406  
Sum of electronic and zero-point Energies= -585.998477  
Sum of electronic and thermal Energies= -585.982870  
Sum of electronic and thermal Enthalpies= -585.981926  
Sum of electronic and thermal Free Energies= -586.039925

mpw1pw91/6-311+G(2d,p)//B3LYP/6-31G\*

DFT = -586.387200021  
DFT + ZPE = -586.01935

## Supplemental Methods

### *Protein expression and purification*

pH9GW expression vectors (an in-house Gateway destination vector) were transformed into *E. coli* BL21( $\lambda$ DE3) and plated on LB agar containing 50  $\mu$ g/mL kanamycin for selection. Colonies were transferred to 100 mL of liquid media (LB with kanamycin) followed by 16-h growth with shaking at 37 °C at 275 rpm. Cultures were diluted 50-fold into 1 L of Terrific Broth with kanamycin, followed by growth with shaking at 37 °C at 275 rpm until cultures reached OD<sub>600</sub>  $\geq$  1.5. Protein expression was induced by addition of isopropyl  $\beta$ -D-thiogalactoside (IPTG) to 0.1 mM followed by growth with shaking at 20 °C at 275 rpm for 5 h. Cells were harvested by centrifugation and cell pellets frozen at -20 °C. Frozen pellets were re-suspended in lysis buffer (50 mM Tris-HCl, pH 8.0, 500 mM NaCl, 20 mM imidazole, pH 8.0, 10% [v/v] glycerol, 10 mM  $\beta$ -mercaptoethanol, and 1% [v/v] Tween-20) containing 1 mg/mL lysozyme followed by stirring at 4 °C for 1 h. After sonication and centrifugation, the clarified supernatant was passed over a column of Ni<sup>2+</sup>-NTA resin (Qiagen), washed with 10 bed volumes of lysis buffer and 10 bed volumes of wash buffer (50 mM Tris-HCl, pH 8.0, 500 mM NaCl, 20 mM imidazole, pH 8.0, 20 mM  $\beta$ -mercaptoethanol, and 10% [v/v] glycerol), and the His-tagged protein was eluted with elution buffer (50 mM Tris-HCl, pH 8.0, 500 mM NaCl, 250 mM imidazole, pH 8.0, 20 mM  $\beta$ -mercaptoethanol, and 10% [v/v] glycerol). N-terminal His-tags were removed via proteolysis with thrombin as follows: thrombin was added to a ratio of 1:1,000 [w/w] directly to the eluted protein fraction and dialyzed against two changes of buffer (50 mM Tris-HCl, pH 8.0, 100 mM NaCl, and 10 mM  $\beta$ -mercaptoethanol) over 24 h at 4 °C. Following digestion, samples were passed over a column containing 0.5 mL Benzamidine Sepharose to remove thrombin and 0.5 mL Ni<sup>2+</sup>-NTA resin to capture undigested protein. The resulting protein solutions were collected and

concentrated to approximately 10 mg/mL or greater by centrifugation using 30,000 Da molecular weight cut-off concentrators (Millipore, Bedford, MA). Concentrated samples were injected onto a Sephacryl S-200 column equilibrated with buffer (25 mM Tris–HCl, pH 8.0, 50 mM NaCl and 1 mM DTT). Fractions corresponding to digested protein were verified by SDS-PAGE, pooled and concentrated (as described above) to approximately 20 mg/mL and aliquoted for freezing at -80 °C. Samples were judged to be ~99% pure by Coomassie stained SDS-PAGE gels.

### *Kinetic measurement*

Kinetic characterization of purified wild-type and M4 mutant TEASs were conducted as previously described (1). Briefly, 500- $\mu$ L scale reactions using a 3-component buffer system (25 mM 2- (N-morpholino)ethanesulfonic acid (MES), 50 mM Tris, and 25 mM 3- (cyclohexylamino)propanesulfonic acid (CAPS) at pH 7.0 with 10 mM MgCl<sub>2</sub>) were conducted in triplicate at room temperature (25 °C) with 15 nM protein and variable concentrations of (*cis,trans*)-FPP. Reaction products were analyzed using a Hewlett–Packard 6890 gas chromatograph (GC) coupled to a 5973 mass selective detector (MSD) equipped with an HP-5MS capillary column (0.25 mm i.d. 30 m with 0.25  $\mu$ m film thickness) (Agilent Technologies). Product quantification was performed using SIM mode, set to detect ions with *m/z* = 91, 133, and 189. The GC was operated at a He flow rate of 2 mL/min, and the MSD was operated at 70 eV. Split-less injections (2  $\mu$ L) were performed with an inlet temp of 250 °C, a temp that drives the Cope rearrangement of germacrene A (**11**) to completion. The GC was programmed with an initial oven temp of 50 °C (5-min hold), which was then increased 10 °C/min up to 180 °C (4-min hold), followed by a 100 °C/min ramp until 240 °C (1-min hold). A solvent delay of 8.5 min was allowed prior to the acquisition of the MS data. (+)-2-Epi-prezizaene (**2**) was quantified by integration of peak areas using Enhanced Chemstation (version B.01.00, Agilent Technologies). The GC–MS instrument was calibrated with an authentic (+)-2-epi-prezizaene standard(16).



Corrected velocity data (Table 1) were fitted to the Michaelis–Menten equation using GraphPad Prism (version 4.00 for Windows, GraphPad Software).

## References

1. O'Maille, P. E., Chappell, J. & Noel, J. (2004) A single-vial analytical and quantitative gas chromatography-mass spectrometry assay for terpene synthases. *Anal Biochem* **335**, 210-217.
